# Supplementary material for: Maslinic Acid Ameliorates Inflammation via the Downregulation of NF-κB and STAT-1
Source: PubMed Central journal article supplement (PMC7070941; doi:10.3390/antiox9020106), 2020-01-25
Supplement: antioxidants-09-00106-s001.pdf [file antioxidants-09-00106-s001.pdf]

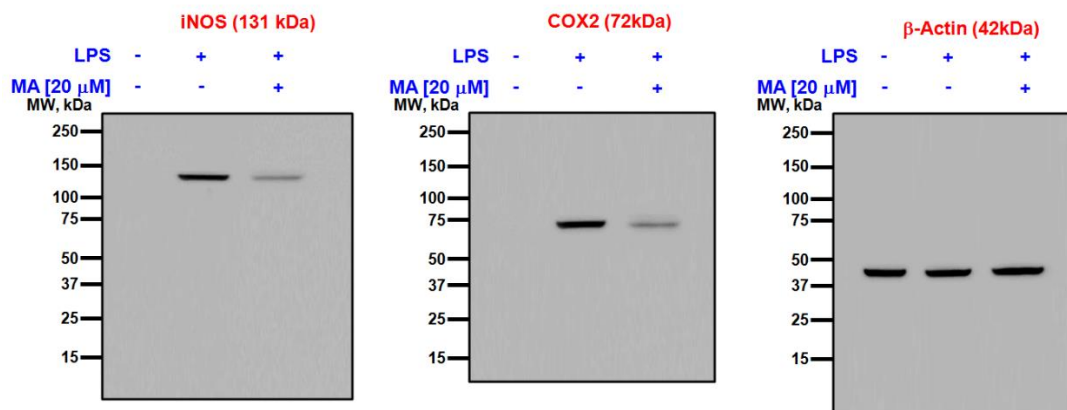

### Supplementary Figure 1 (for Fig 1B)

Figure S1: Uncropped pictures of the Western blot shown in Figure 1B.

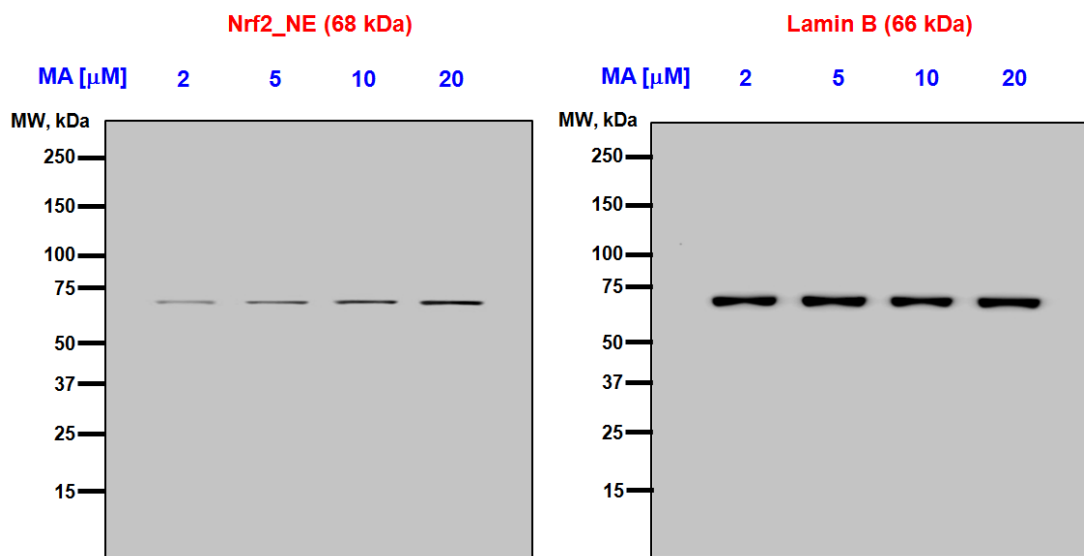

### Supplementary Figure 2 (for Fig 3A upper, Nuclear Extract)

Figure S2: Uncropped pictures of the Western blot shown in Figure 3A (Upper)

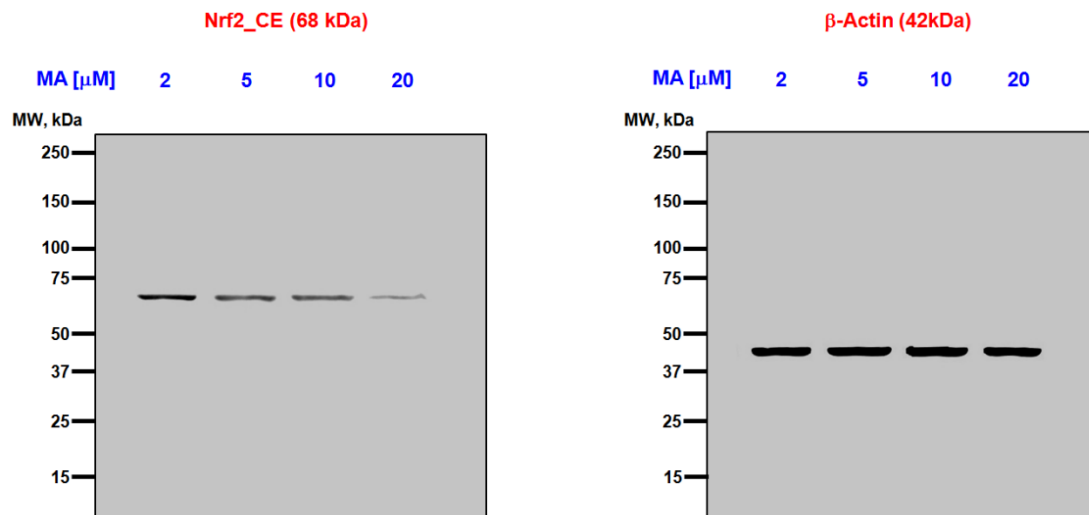

### Supplementary Figure 2 (for Fig 3A lower, (Cytoplasmic Extract))

Figure S3: Uncropped pictures of the Western blot shown in Figure 3A (Lower).
